# Supplementary material for: Dioscorea bulbifera Mediated Synthesis of Novel AucoreAgshell Nanoparticles with Potent Antibiofilm and Antileishmanial Activity
Source: Hindawi journal article supplement (doi:10.1155/2015/562938), 2015-01-01
Supplement: f1 [file 562938.f1.pdf]

## Supporting Information

# ***Dioscorea bulbifera* mediated synthesis of novel Au<sub>core</sub>Ag<sub>shell</sub> nanoparticles with potent antibiofilm and antileishmanial activity**

Sougata Ghosh,<sup>1</sup> Soham Jagtap,<sup>1</sup> Piyush More,<sup>1</sup> Usha J. Shete,<sup>2</sup> Neeraj O. Maheshwari,<sup>2</sup>  
Shilpa J. Rao,<sup>3</sup> Rohini Kitture,<sup>4</sup> Sangeeta Kale,<sup>4</sup> Jayesh Bellare,<sup>5</sup> Shivprasad Patil,<sup>2</sup> Jayanta  
K. Pal<sup>3</sup> and Balu A. Chopade<sup>6\*</sup>

<sup>1</sup>*Institute of Bioinformatics and Biotechnology, University of Pune, Pune-411007, India;*  
<sup>2</sup>*Nanomechanics Laboratory, Department of Physics, Indian Institute of Science, Education  
and Research, Pune, India;* <sup>3</sup>*Cell and Molecular Biology Laboratory, Department of  
Biotechnology, University of Pune, Pune-411007, India;* <sup>4</sup>*Department of Applied Physics,  
Defense Institute of Advanced Technology, Girinagar, Pune-411025, India;* <sup>5</sup>*Department of  
Chemical Engineering, Indian Institute of Technology, Bombay, Powai, Mumbai-400076,  
India;* <sup>6</sup>*Department of Microbiology, University of Pune, Pune-411007, India.*

[chopade@unipune.ac.in](mailto:chopade@unipune.ac.in)

| List of figures                                                                                                                                                                                                                                                               | Page no. |
|-------------------------------------------------------------------------------------------------------------------------------------------------------------------------------------------------------------------------------------------------------------------------------|----------|
| Figure S1. Force curve for <i>A. baumannii</i> biofilm formation (untreated control) and inhibition (treated with Au <sub>core</sub> Ag <sub>shell</sub> NPs)                                                                                                                 | S2       |
| Figure S2. Characterization of Au <sub>core</sub> Ag <sub>shell</sub> NPs synthesized by DBTE employing transmission electron microscopy. Core shell nanoparticles seen at various magnifications (a) inset bar indicating 50 nm and (b) with inset bars equivalent to 20 nm. | S2       |

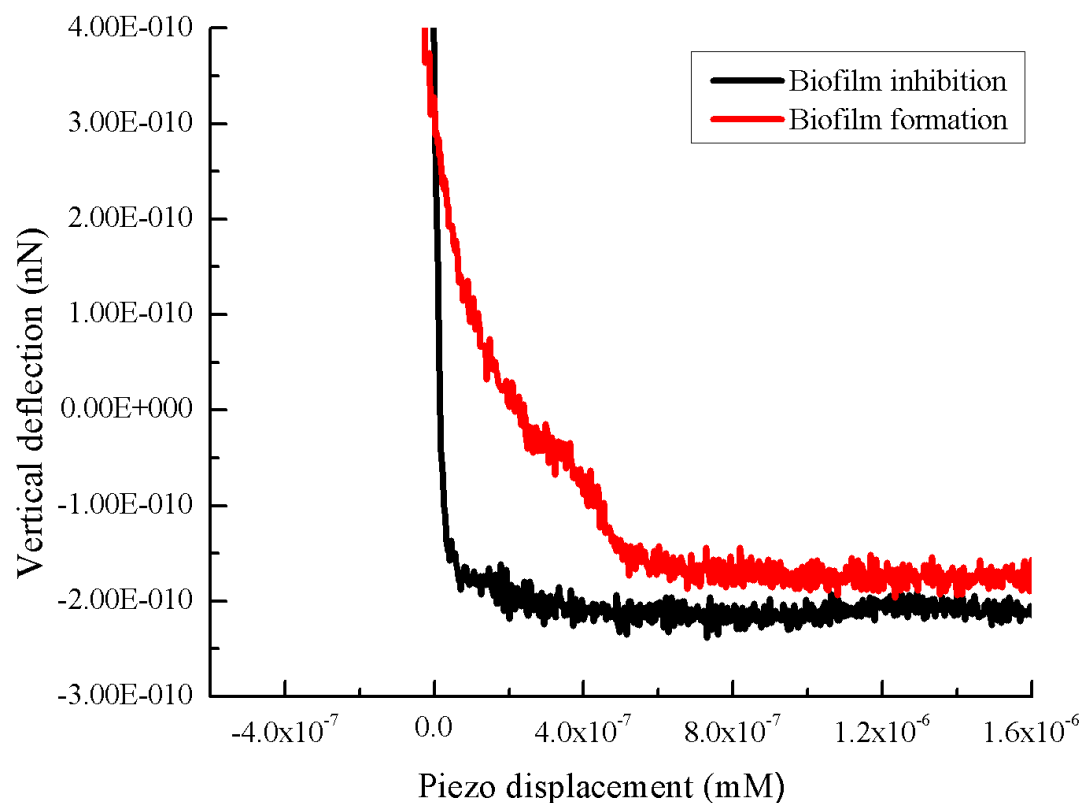

Figure S1. Force curve for *A. Baumannii* biofilm formation (untreated control) and inhibition (treated with  $\text{Au}_{\text{core}}\text{Ag}_{\text{shell}}$ NPs).

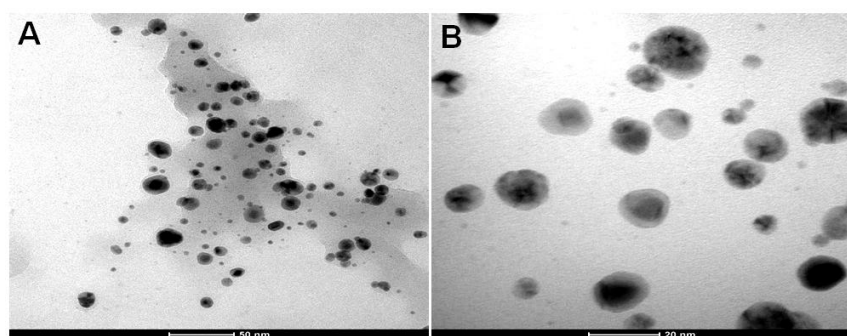

FIGURE S2: Characterization of  $\text{Au}_{\text{core}}\text{Ag}_{\text{shell}}$ NPs synthesized by DBTE employing transmission electron microscopy. Core shell nanoparticles seen at various magnifications (a) inset bar indicating 50 nm and (b) with inset bars equivalent to 20 nm.
